# Supplementary material for: Hydrogenation of CO2 to methanol over In-doped m-ZrO2: a DFT investigation into the oxygen vacancy size-dependent reaction mechanism
Source: Royal Society of Chemistry journal article supplement (doi:10.1039/d2cp02788g), 2022-01-01
Supplement: d2cp02788g1.pdf [file d2cp02788g1.pdf]

**Supporting Information for**

**CO<sub>2</sub> Hydrogenation to Methanol over In-doped m-ZrO<sub>2</sub>: A DFT**

**Investigation into the Size-Dependent Mechanism of Oxygen**

**Vacancy**

Jie Yu,<sup>a</sup> Yabing Zeng,<sup>b</sup> Wei Lin,<sup>\*b,c</sup> and Xin Lu<sup>\*a,c</sup>

<sup>a</sup> *State Key Laboratory of Physical Chemistry of Solid Surfaces, College of Chemistry and Chemical Engineering, Xiamen University, Xiamen 361005, Fujian, China.*

<sup>b</sup> *College of Chemistry, Fuzhou University, Fuzhou 350108, Fujian, China.*

<sup>c</sup> *Fujian Provincial Key Laboratory of Theoretical and Computational Chemistry, Xiamen University, Xiamen 361005, Fujian, China.*

\* Corresponding authors.

Tel: +86-0592-2181600; Fax: +86-0592-2183047.

E-mail: xinlu@xmu.edu.cn (Xin Lu); wlin@fzu.edu.cn (Wei Lin).

**Table S1.** Surface Formation Energies of (111) m-ZrO<sub>2</sub>

| Exposed Phase | $\gamma$ /(J.m <sup>2</sup> ) for relaxed surface |                    |                     |                    | $\gamma$ /(J.m <sup>2</sup> ) for unrelaxed surface |      |      |      |
|---------------|---------------------------------------------------|--------------------|---------------------|--------------------|-----------------------------------------------------|------|------|------|
|               | This work                                         | PBE <sup>[1]</sup> | PW91 <sup>[2]</sup> | LDA <sup>[3]</sup> | This work                                           | PBE  | PW91 | LDA  |
| <b>(111)</b>  | 1.11                                              | 1.11               | 1.06                | 1.54               | 1.42                                                | 1.39 | 1.39 | 1.86 |

**Table S2.** Oxygen Vacancy Formation Energy ( $E_{(vac)}$ , in eV) of ZrO<sub>2</sub>\_T2, ZrO<sub>2</sub>\_T3 and ZrO<sub>2</sub>\_T4 by thermal, H<sub>2</sub> and CO reductions.

| reduction type           | surface model        | a    | b    | c    | d    | e    |
|--------------------------|----------------------|------|------|------|------|------|
| thermal reduction        | ZrO <sub>2</sub> _T2 | 5.81 | 6.43 | 5.59 | 6.40 | 6.76 |
|                          | ZrO <sub>2</sub> _T3 |      | 6.76 | 5.76 | 6.23 | 5.59 |
|                          | ZrO <sub>2</sub> _T4 | 5.97 | 5.13 | 6.17 | 5.41 | 5.64 |
| H <sub>2</sub> reduction | ZrO <sub>2</sub> _T2 | 3.26 | 2.79 | 3.10 | 3.46 | 2.88 |
|                          | ZrO <sub>2</sub> _T3 |      | 4.22 | 3.23 | 3.69 | 3.05 |
|                          | ZrO <sub>2</sub> _T4 | 3.43 | 2.60 | 3.63 | 2.87 | 3.1  |
| CO reduction             | ZrO <sub>2</sub> _T2 | 2.53 | 2.06 | 2.37 | 2.73 | 2.15 |
|                          | ZrO <sub>2</sub> _T3 |      | 3.50 | 2.50 | 2.96 | 2.32 |
|                          | ZrO <sub>2</sub> _T4 | 2.71 | 1.87 | 2.91 | 2.15 | 2.37 |

**Table S3.** Calculated bond distances (in Å) between specific atoms of perfect and O<sub>v</sub> defective In@m-ZrO<sub>2</sub> surfaces.

|                                                 | Zr1-In | Zr5-In | Zr1-Zr5 | Zr3-In | Zr4-In | Zr3-Zr5 |
|-------------------------------------------------|--------|--------|---------|--------|--------|---------|
| perfect In@m-ZrO <sub>2</sub>                   | 3.55   | 3.44   | 3.48    | 3.99   | 3.47   | 3.64    |
| O1 <sub>v</sub> defective In@m-ZrO <sub>2</sub> | 3.79   | 3.69   | 3.86    | 3.91   | 3.51   | 3.63    |
| O2 <sub>v</sub> defective In@m-ZrO <sub>2</sub> | 3.86   | 3.50   | 3.53    | 3.87   | 3.42   | 3.67    |
| O4 <sub>v</sub> defective In@m-ZrO <sub>2</sub> | 3.43   | 3.45   | 3.44    | 4.32   | 4.14   | 4.68    |

**Table S4.** Reaction energies (in eV) of atomic hydrogen migration on the O1<sub>v</sub>, O2<sub>v</sub> and O4<sub>v</sub> surfaces.

|                                    | ΔE                    |      |      |      |      |      |
|------------------------------------|-----------------------|------|------|------|------|------|
|                                    | O4                    | O6   | O8   | O9   | O10  | O11  |
| Homo-transfer <sup>a</sup>         | <b>O1<sub>v</sub></b> |      |      |      |      |      |
|                                    | 0.31                  | 0.81 | 0.61 | 0.33 | 0.47 | 0.37 |
|                                    | <b>O2<sub>v</sub></b> |      |      |      |      |      |
|                                    | 0.66                  | 0.59 | 0.35 | 0.02 | 0.17 | 0.07 |
|                                    | <b>O4<sub>v</sub></b> |      |      |      |      |      |
|                                    |                       |      | 0.49 | 0.78 | 0.49 | 0.92 |
| Heterogenous-transfer <sup>b</sup> | <b>O1<sub>v</sub></b> |      |      |      |      |      |
|                                    | 0.29                  | 0.34 | 0.42 | 0.25 | 0.37 | 0.24 |
|                                    | <b>O2<sub>v</sub></b> |      |      |      |      |      |
|                                    | 0.23                  | 0.32 | 0.41 | 0.21 | 0.36 | 0.24 |
|                                    | <b>O4<sub>v</sub></b> |      |      |      |      |      |
|                                    |                       |      | 0.46 | 0.67 | 0.57 | 0.79 |

<sup>a.</sup> Homo-transfer is defined as fixing one of the dissociative hydrogen atoms at O7 while migration the other to O6-O10 individually.

<sup>b.</sup> Heterogenous-transfer is defined as fixing one of the dissociative hydrogen atoms at In while migration the other to O6-O10 individually.

**Table S5.** Calculated Harmonic Vibrational Frequencies ( $\text{cm}^{-1}$ ) of stable- $\text{CH}_3\text{O}$  ( $s\text{-CH}_3\text{O}$ ) on O1\_v and O4\_v surface

| <b><math>s\text{-CH}_3\text{O}^*</math> on O1_v</b> | <b><math>s\text{-CH}_3\text{O}^*</math> on O4_v</b> |
|-----------------------------------------------------|-----------------------------------------------------|
| 3047                                                | 3043                                                |
| 3025                                                | 3017                                                |
| 2941                                                | 2937                                                |
| 1471                                                | 1473                                                |
| 1453                                                | 1461                                                |
| 1430                                                | 1429                                                |
| 1171                                                | 1174                                                |
| 1140                                                | 1137                                                |
| 1035 <sup>a</sup>                                   | 1000 <sup>b</sup>                                   |
| 412                                                 | 334                                                 |
| 259                                                 | 281                                                 |
| 221                                                 | 202                                                 |
| 175                                                 | 143                                                 |
| 153                                                 | 137                                                 |
| 93                                                  | 110                                                 |

a. Frequency of C-O stretching mode for  $s\text{-CH}_3\text{O}^*$  on O1\_v

b. Frequency of C-O stretching mode for  $s\text{-CH}_3\text{O}^*$  on O4\_v

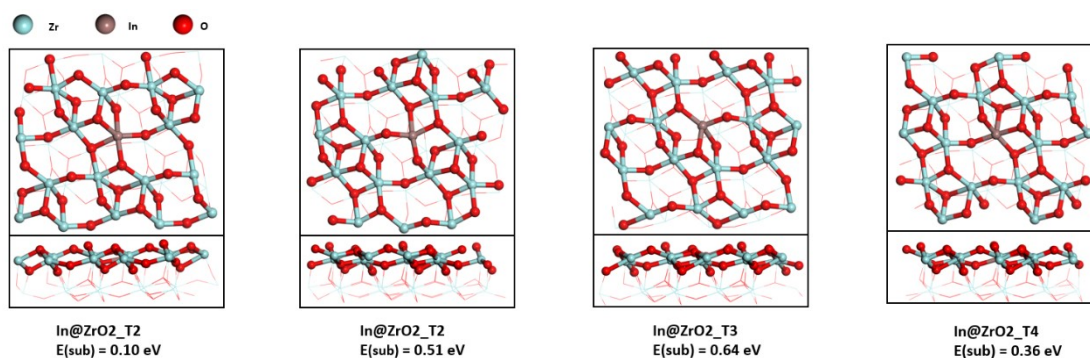

**Figure S1.** Optimized structures of In@m-ZrO<sub>2</sub>\_T1 to In@m-ZrO<sub>2</sub>\_T4 surfaces top (upper) and side (lower) view and their respective In substitution energy ( $E_{\text{(sub)}}$ )

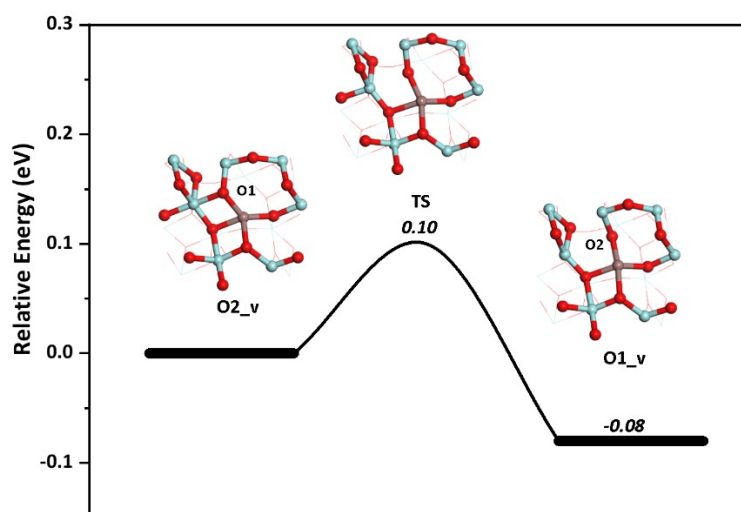

**Figure S2.** Potential energy diagram of dynamic equilibrium between O1\_v and O2\_v defective In@m-ZrO<sub>2</sub>.

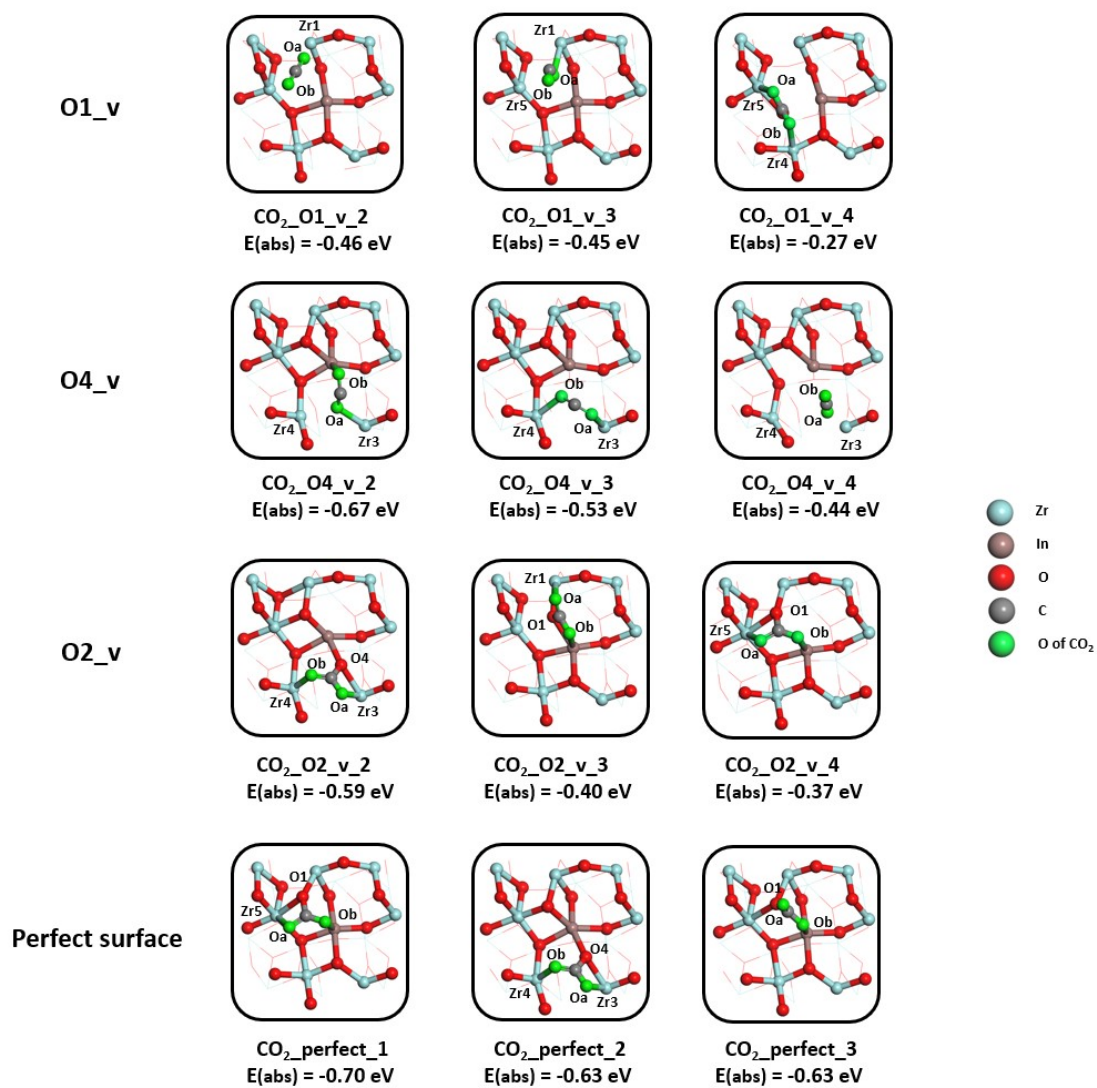

**Figure S3.** Other optimized structures of CO<sub>2</sub> adsorption on O1\_v defective In@m-ZrO<sub>2</sub>, O4\_v defective In@m-ZrO<sub>2</sub>, O2\_v defective In@m-ZrO<sub>2</sub> and perfect In@m-ZrO<sub>2</sub>.

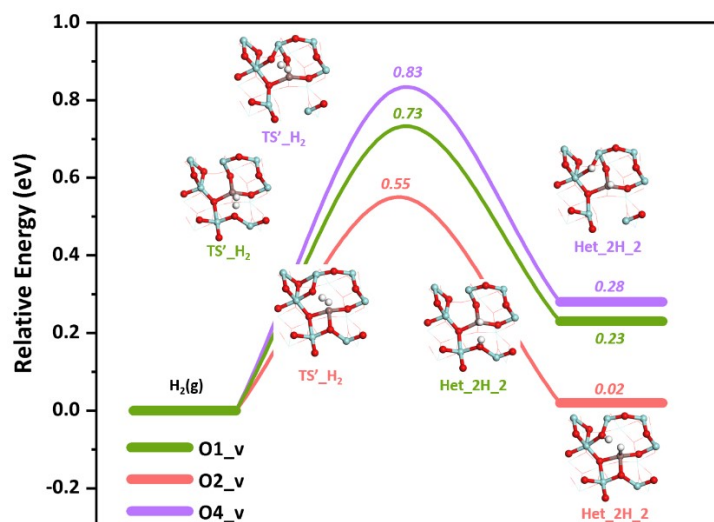

a

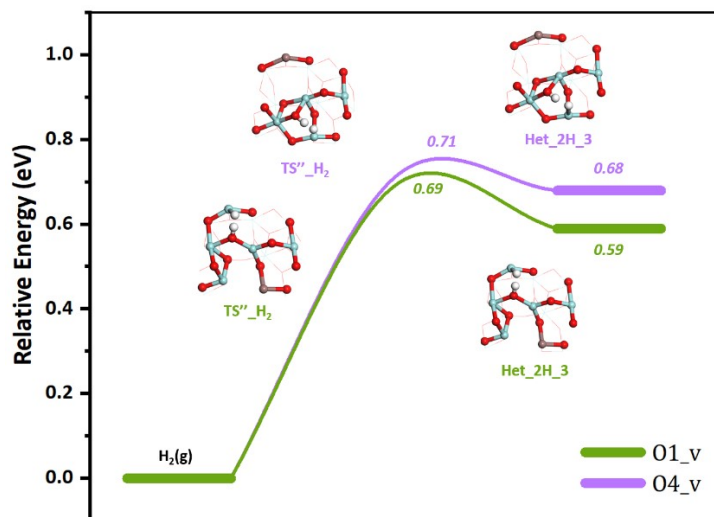

b

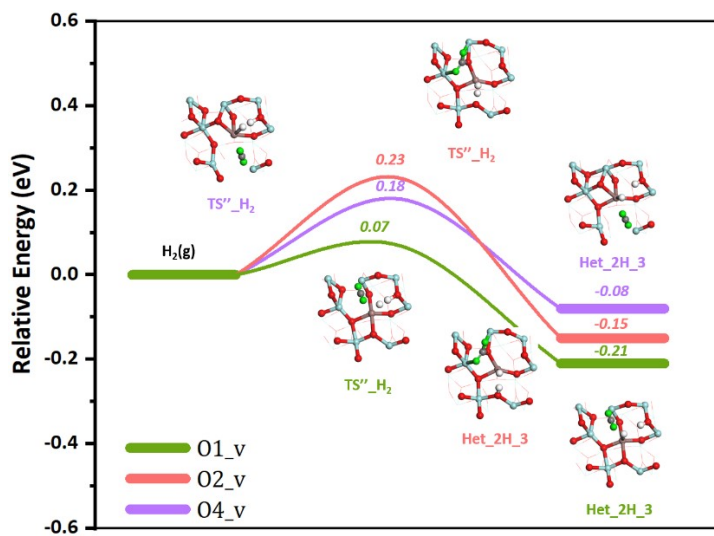

c

**Figure S4.** Potential energy diagram of (a) less favorable H<sub>2</sub> heterolytic dissociation between In and O on O1<sub>v</sub> (green), O4<sub>v</sub> (purple) and O2<sub>v</sub> (pink) surfaces; (b) H<sub>2</sub> heterolytic dissociation

between Zr and O on O1\_v (green) and O4\_v (purple); (c) H<sub>2</sub> heterolysis dissociation between In and O on O1\_v (green), O2\_v (red) and O4\_v (purple) in the presence of CO<sub>2</sub> adsorption.

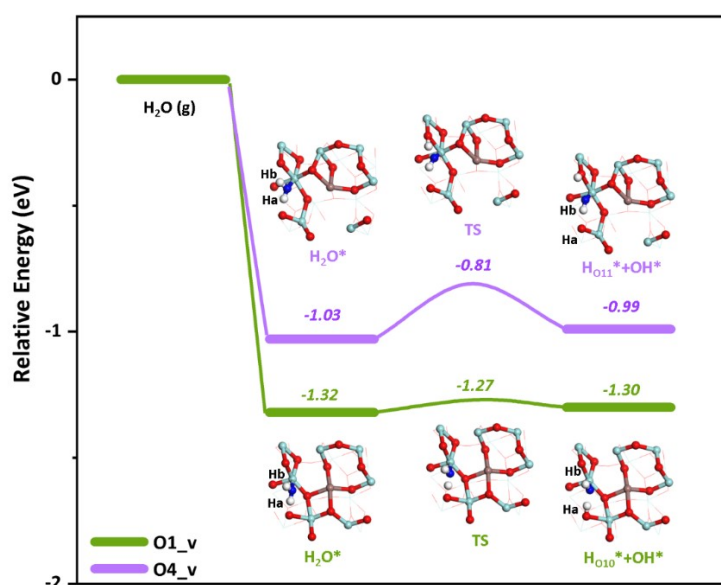

**Figure S5.** Potential energy diagram of H<sub>2</sub>O dissociation on O1\_v (green) and O4\_v (purple) surfaces. Atoms in blue color represents oxygen atom from dissociated H<sub>2</sub>O.

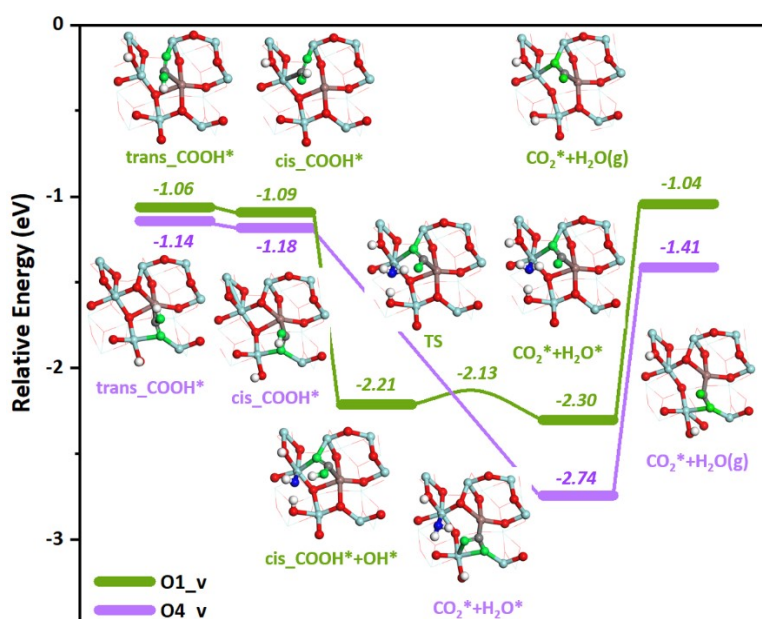



**Figure S6.** Potential energy diagram of OH\* assisted deprotonation of COOH on O1\_v (green) and O4\_v (purple) surfaces. Atom in blue and green colors represents oxygen atoms from H<sub>2</sub>O and CO<sub>2</sub>, respectively.

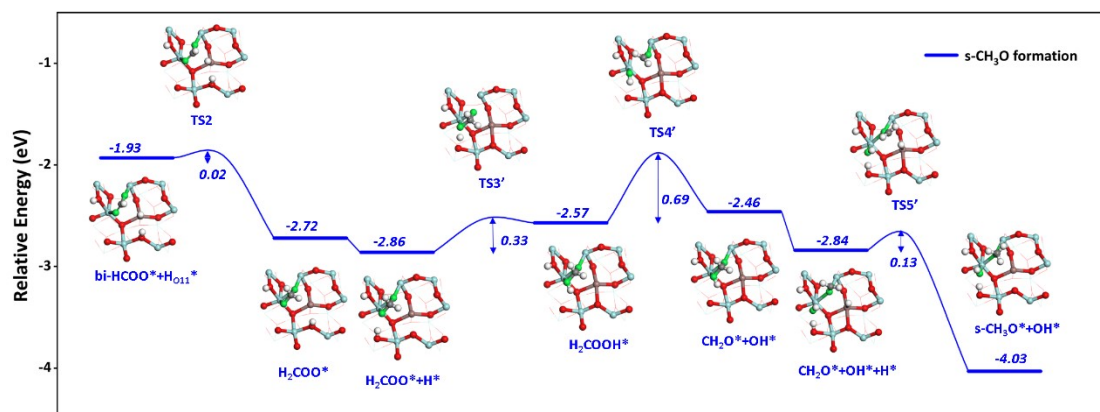

**Figure S7.** Potential energy diagram of stable-CH<sub>3</sub>O(s-CH<sub>3</sub>O) formation on O1\_v surface.

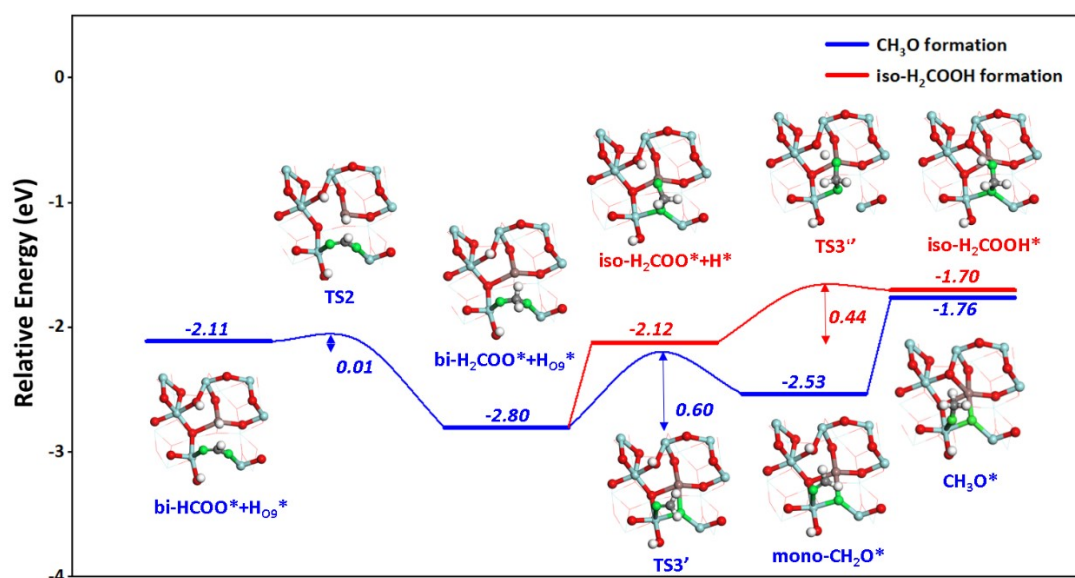

**Figure S8.** Potential energy diagram of other reactions during CO<sub>2</sub> hydrogenation on O4\_v surface.

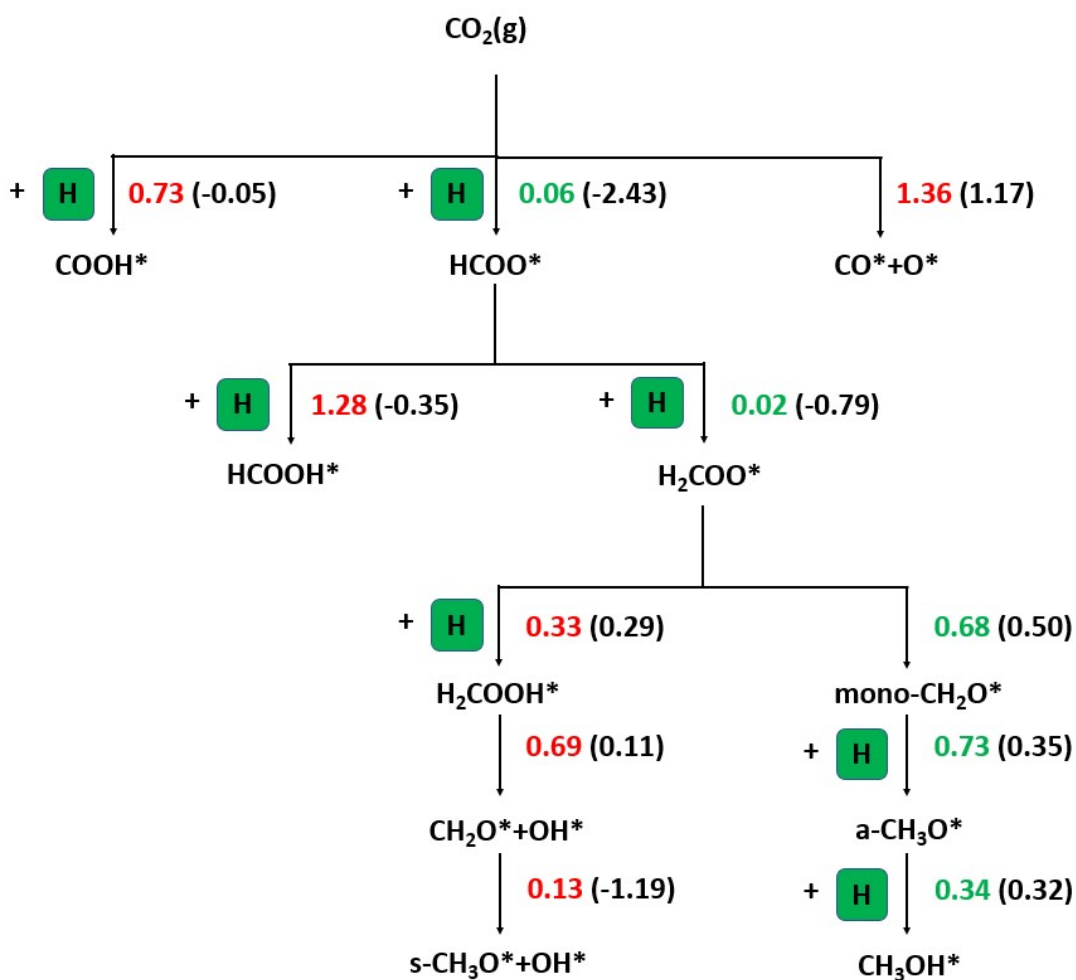

**Figure S9.** Reaction network of  $\text{CO}_2$  hydrogenation on  $\text{O1}_v$  defective  $\text{In@m-ZrO}_2$ . The reaction barrier is marked with number in either green (the most preferred route leading to methanol synthesis) or red (other routes). The reaction energy is marked with black number in the bracket. Unit of relative energy are given in electronic voltage (eV).

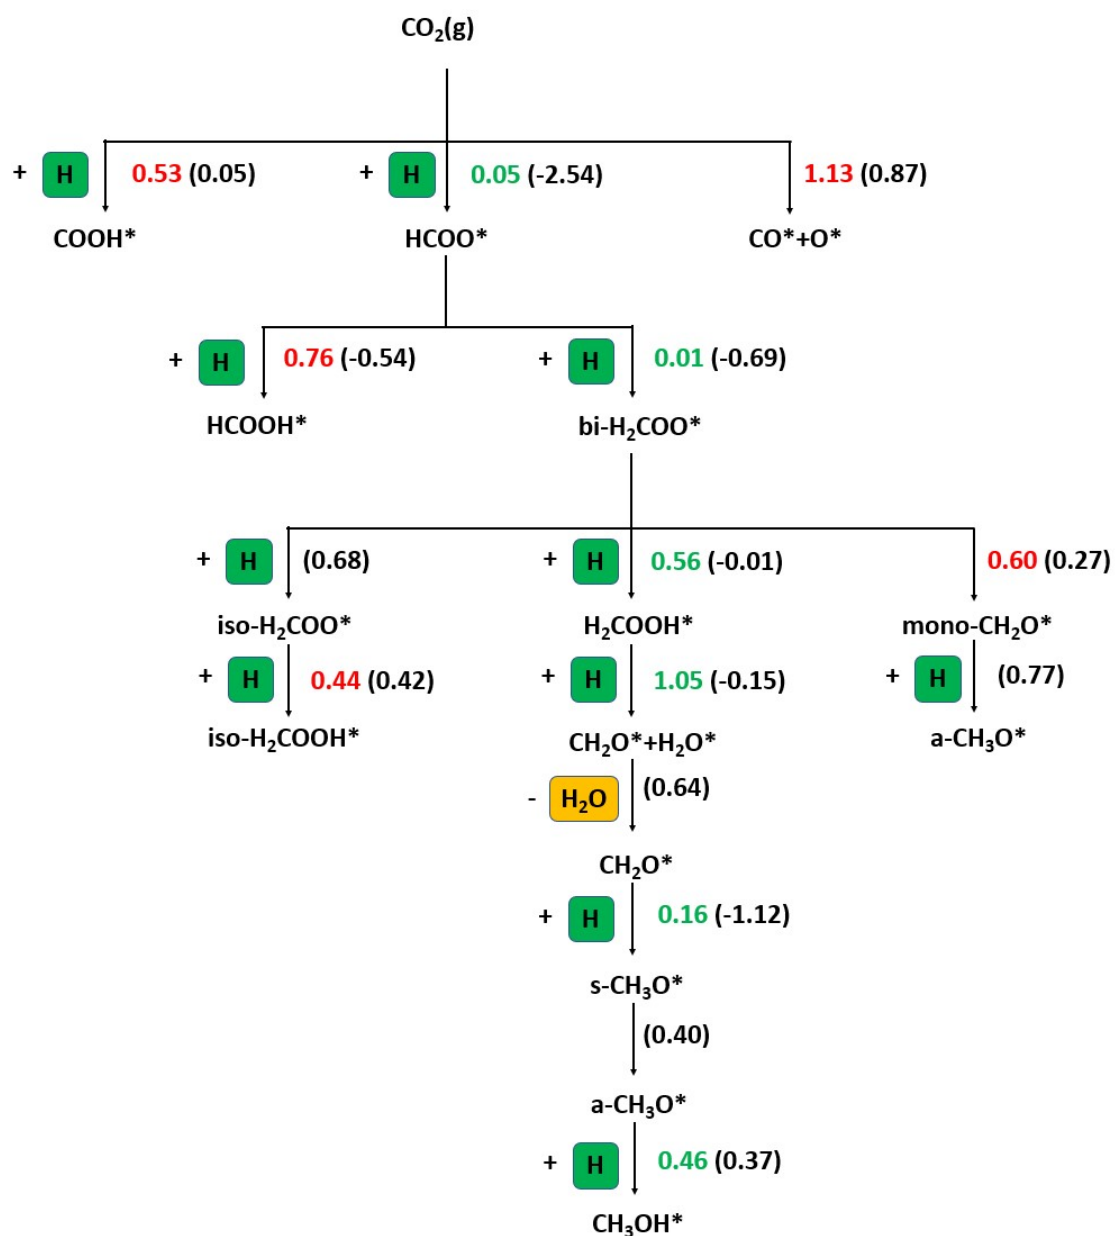

**Figure S10.** Reaction network of CO<sub>2</sub> hydrogenation on O<sub>4\_v</sub> defective In@m-ZrO<sub>2</sub>. The reaction barrier is marked with number in either green (the most preferred route leading to methanol synthesis) or red (other routes). The reaction energy is marked with black number in the bracket. Unit of relative energy are given in electronic voltage (eV).
